# Supplementary material
Source: PubMed Central journal article supplement (PMC2728013)

**Supplementary Figure S1. Immunohistochemical staining of cystatin B in a normal bladder and bladder cancer tissue microarray.** Cystatin B antibody (clone A6/2) was used for immunohistochemical staining of BL801 tissue microarray (US Biomax Inc.) containing normal and TCC tissue specimens. Patient data for each tissue core is listed in Supplementary Table S1.

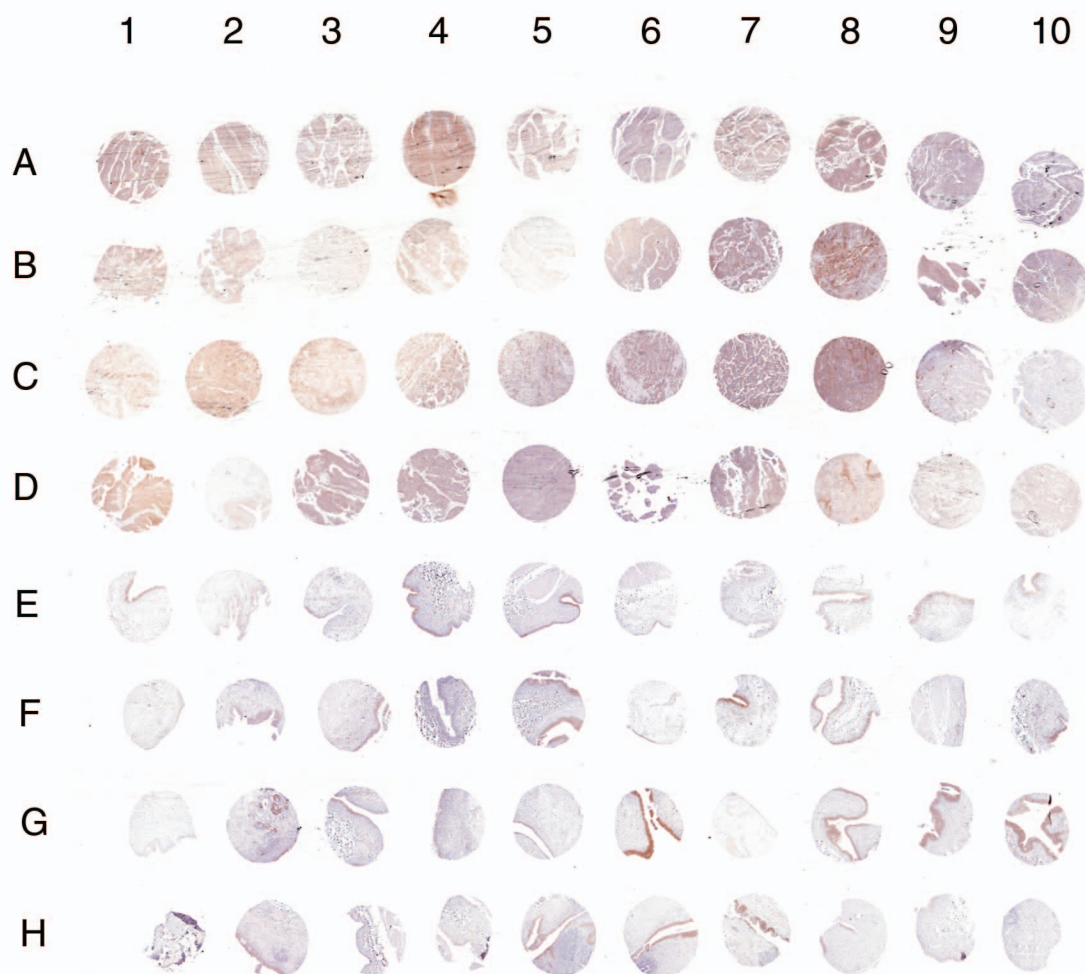

Supplement: NIHMS96789-supplement-Figure_S1.pdf [file NIHMS96789-supplement-Figure_S1.pdf]
